# Supplementary material for: Applicability of Next Generation Sequencing Technology in Microsatellite Instability Testing
Source: Genes (Basel). 2015 Feb 12;6(1):46–59. doi: 10.3390/genes6010046 (PMC4377833; doi:10.3390/genes6010046)
Supplement: Supplementary File 1 [file genes-06-00046-s001.txt]

AmpliVar_MSI

System Requirements: 
Linux or FreeBDS (e.g. Mac OS X) operating system with BASH shell.
Perl >5.6
Software Dependency:
SeqPrep (see https://github.com/jstjohn/SeqPrep)

AmpliVar_MSI is a tool for MSI detection in amplicon-based next generation sequencing (NGS) data.

AmpliVar_MSI does not require a reference genome for sequence alignment. Instead a list of sequences that flank each microsatellite needs to be provided as a text file.

Installation
The Perl script needs to be in the current path or directory
SeqPrep requires compilation as described in the SeqPrep documentation (https://github.com/jstjohn/SeqPrep)

File naming and formats
Paired FASTQ files in the input directory must have the suffix of "_R1.fastq.gz" or "_R2.fastq.gz".

The MSI primers and flanking sequence files must take the following form in tab-separated text as shown in the table below (without header row) with Unix line endings
While there is no restriction on the first three columns, currently all flanking primer sequence needs to be exactly 11-bases on either side of the target region.

Usage
perl amplivar.pl -i path/to/source_directory -j path/to/usual_suspect -k path/to/amplicon_flanks

Usual Suspect table
Amplicon	Location	Primer Sequence
BAT 25	 Chromosome 4q12	f	GCCTCC
BAT 26	 Chromosome 2p	f	ACTACT
BAT 34c4	 Chromosome 17p13.1	f	CCTGGA
D5S346	 Chromosome 5q22.2	f	TCACTC
D18S55	 Chromosome 18q22.1	f	GAAGTC
BAT 25	 Chromosome 4q12	r	AATGCA
BAT 26	 Chromosome 2p	r	GAATGG
BAT 34c4	 Chromosome 17p13.1	r	GCTTTG
D5S346	 Chromosome 5q22.2	r	TATCTG
D18S55	 Chromosome 18q22.1	r	CAGAAG

Amplicon Flanks table
Amplicon	Length	Coordinate	Flanking primer sequence
BAT25	4q12	55598274-55598274	GGGAGT(.*)AGCCAT
BAT26	2p	47641608-47641608	GTATAT(.*)GGGTTA
BAT34c4	17p13.1	7572143-7572254	ACTTGT(.*)TCTCGC
D5S346	5q22.2	112213648-112213748	GATAAA(.*)AAAAAC
D18S55	18q22.1	61873525-61873648	CAATAT(.*)TACTCA

The output will be a list of read counts corresponding to each locus and representing the number of reads of each type.  These table can be pasted into Excel for display and further analysis
